# Supplementary material for: Formation of Mobile Chromatin-Associated Nuclear Foci Containing HIV-1 Vpr and VPRBP Is Critical for the Induction of G2 Cell Cycle Arrest
Source: PubMed Central journal article supplement (PMC2932712; doi:10.1371/journal.ppat.1001080), 2010-09-02

**A**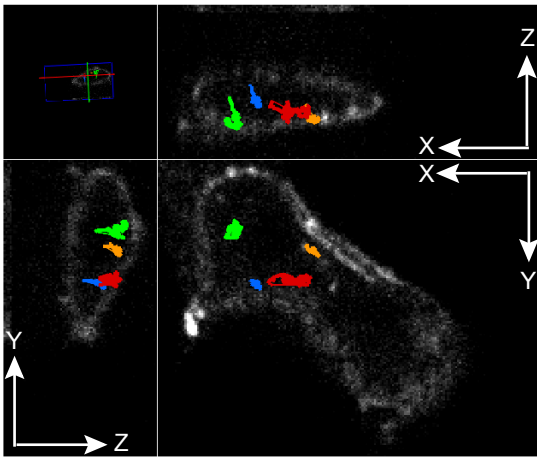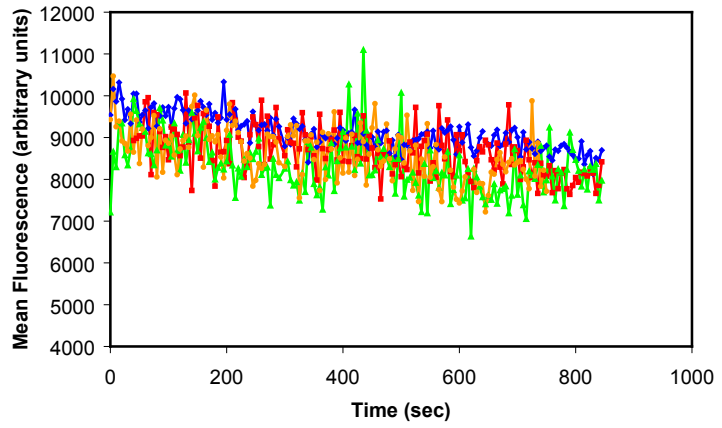**B**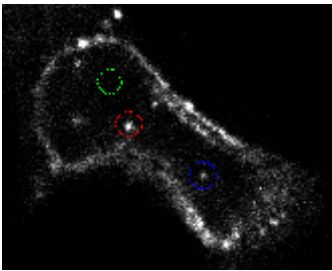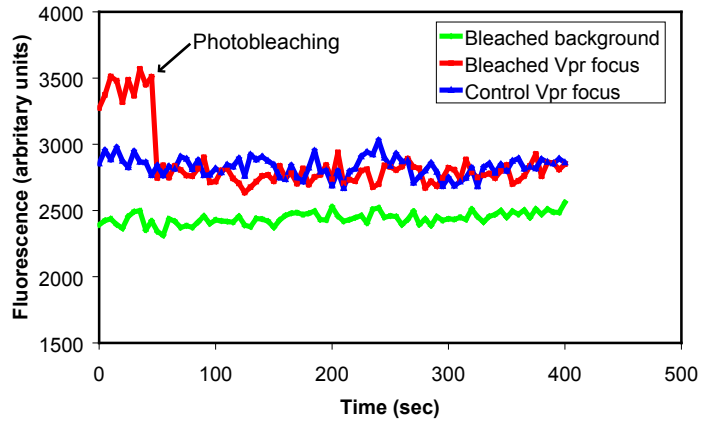

Supplement: ppat.1001080.s006.pdf [file ppat.1001080.s006.pdf]
